# Supplementary material for: An Eco-Friendly Extraction and Purification Approach for Obtaining Active Ingredients for Cosmetics from Two Marine Brown Seaweeds
Source: MDPI journal article supplement (doi:10.3390/md22030112), 2024-02-28
Supplement: s1 [file s1]

## Supplementary Materials

**Table S1.** *P*-values obtained with statistical tests (Post-hoc after a Kruskal-Wallis test) applied on the SPE fractions for (A) the Total Phenolic Content (TPC), (B) Radical scavenging activity by DPPH assay expressed as IC<sub>50</sub>, and (C) antioxidant activity by FRAP assay expressed as EC<sub>50</sub> of *Ascophyllum nodosum* (first number) and *Halidrys siliquosa* (second number), respectively. Significant values (*p* < 0.05) are written in bold.

A

| TPC            | ASE                  | SPE EtOH              | SPE EtOH/DCM         | SPE Water                   |
|----------------|----------------------|-----------------------|----------------------|-----------------------------|
| SPE EtOH       | <b>0.020</b> / 1.000 | X                     | X                    | X                           |
| SPE EtOH:DCM   | 0.430 / 0.156        | <b>0.003</b> / 0.441  | X                    | X                           |
| SPE Water      | 0.181 / <b>0.045</b> | <b>0.0005</b> / 0.234 | 0.996 / 0.996        | X                           |
| SPE Water:EtOH | 0.658 / 0.159        | 0.616 / 0.415         | 0.102 / <b>0.006</b> | <b>0.032</b> / <b>0.001</b> |

B

| IC <sub>50</sub> | ASE           | BHA                         | SPE EtOH      | SPE EtOH/DCM         | SPE Water/EtOH       | Vit C         |
|------------------|---------------|-----------------------------|---------------|----------------------|----------------------|---------------|
| BHA              | 0.314 / 0.091 | X                           | X             | X                    | X                    | X             |
| SPE EtOH         | 0.961 / 0.887 | 0.945 / 0.881               | X             | X                    | X                    | X             |
| SPE EtOH:DCM     | 0.820 / 0.879 | <b>0.036</b> / <b>0.020</b> | 0.401 / 0.411 | X                    | X                    | X             |
| SPE Water:EtOH   | 0.988 / 0.931 | 0.145 / 0.834               | 0.744 / 1.000 | 0.999 / 0.478        | X                    | X             |
| Vit C            | 0.083 / 0.017 | 0.999 / 0.999               | 0.709 / 0.618 | <b>0.006</b> / 0.004 | <b>0.036</b> / 0.548 | X             |
| Vit E            | 0.704 / 0.316 | 0.999 / 0.995               | 0.999 / 0.988 | 0.145 / 0.080        | 0.401 / 0.970        | 0.945 / 0.969 |

C

| EC <sub>50</sub> | ASE                  | BHA                         | SPE EtOH      | SPE EtOH/DCM                | SPE Water/EtOH | Vit C         |
|------------------|----------------------|-----------------------------|---------------|-----------------------------|----------------|---------------|
| BHA              | 0.141 / 0.073        | X                           | X             | X                           | X              | X             |
| SPE EtOH         | 0.799 / 0.858        | 0.990 / 0.947               | X             | X                           | X              | X             |
| SPE EtOH:DCM     | 0.675 / 0.909        | <b>0.020</b> / <b>0.031</b> | 0.208 / 0.454 | X                           | X              | X             |
| SPE Water:EtOH   | 1.000 / 0.274        | 0.430 / 1.000               | 0.927 / 1.000 | 0.916 / 0.106               | X              | X             |
| Vit C            | 0.100 / <b>0.049</b> | 1.000 / 1.000               | 0.979 / 0.916 | <b>0.014</b> / <b>0.022</b> | 0.361 / 1.000  | X             |
| Vit E            | 0.429 / 0.541        | 1.000 / 0.995               | 1.000 / 1.000 | 0.073 / 0.224               | 0.721 / 1.000  | 0.996 / 0.990 |

**Table S2.** Photoprotective activities (SPF and PF-UVA) of one SPE fraction for *Ascophyllum nosum* (An) (EtOH) and two SPE fractions for *Halidrys siliquosa* (Hs) (Water:EtOH and EtOH) compared to the crude ASE extract. Letters indicate differences between fractions for *H. siliquosa* (Kruskal-Wallis,  $p < 0.005$ ).

| Seaweeds | Fractions      | SPF               | PF-UVA            |
|----------|----------------|-------------------|-------------------|
| An       | ASE 1C150      | 0                 | 0                 |
|          | SPE EtOH       | $1.42 \pm 0.04$   | $1.29 \pm 0.03$   |
|          | ASE 2C150      | $2.33 \pm 0.46^a$ | $1.85 \pm 0.20^a$ |
| Hs       | SPE Water:EtOH | $1.17 \pm 0.01^b$ | $1.10 \pm 0.01^b$ |
|          | SPE EtOH       | $1.82 \pm 0.08^b$ | $1.47 \pm 0.05^b$ |

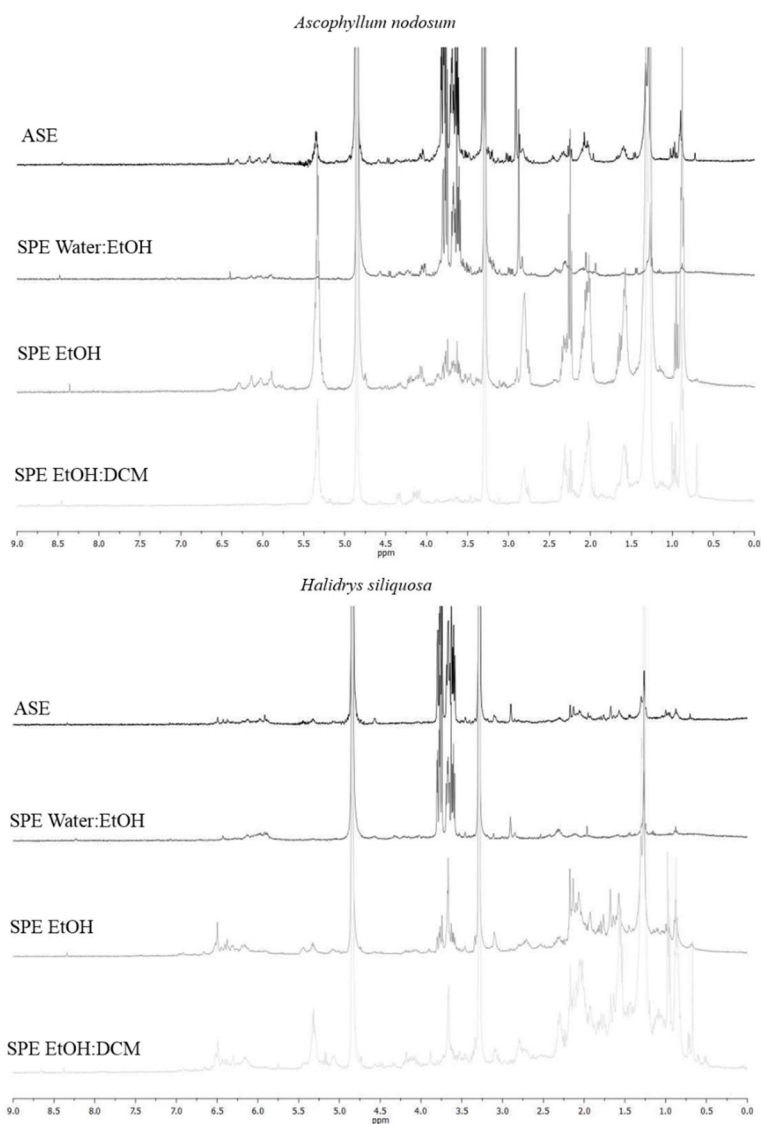

**Figure S1:** Entire <sup>1</sup>H NMR spectra of SPE fractions from *Ascophyllum nodosum* (on the left) and *Halidrys siliquosa* (on the right) compared to the crude extract ASE. <sup>1</sup>H NMR spectra were obtained on a Bruker Avance 400 and from samples dissolved within deuterated methanol.
